# Supplementary material
Source: PubMed Central journal article supplement (PMC4963273)
Supplement: NIHMS761682-supplement-Supp_Info.pdf [file NIHMS761682-supplement-Supp_Info.pdf]

Supporting Information (Supplementary Figures 1-4)

Auger et al. Arthritis in KRN T cell receptor transgenic mice does not require interleukin-17 or Th17 cells.

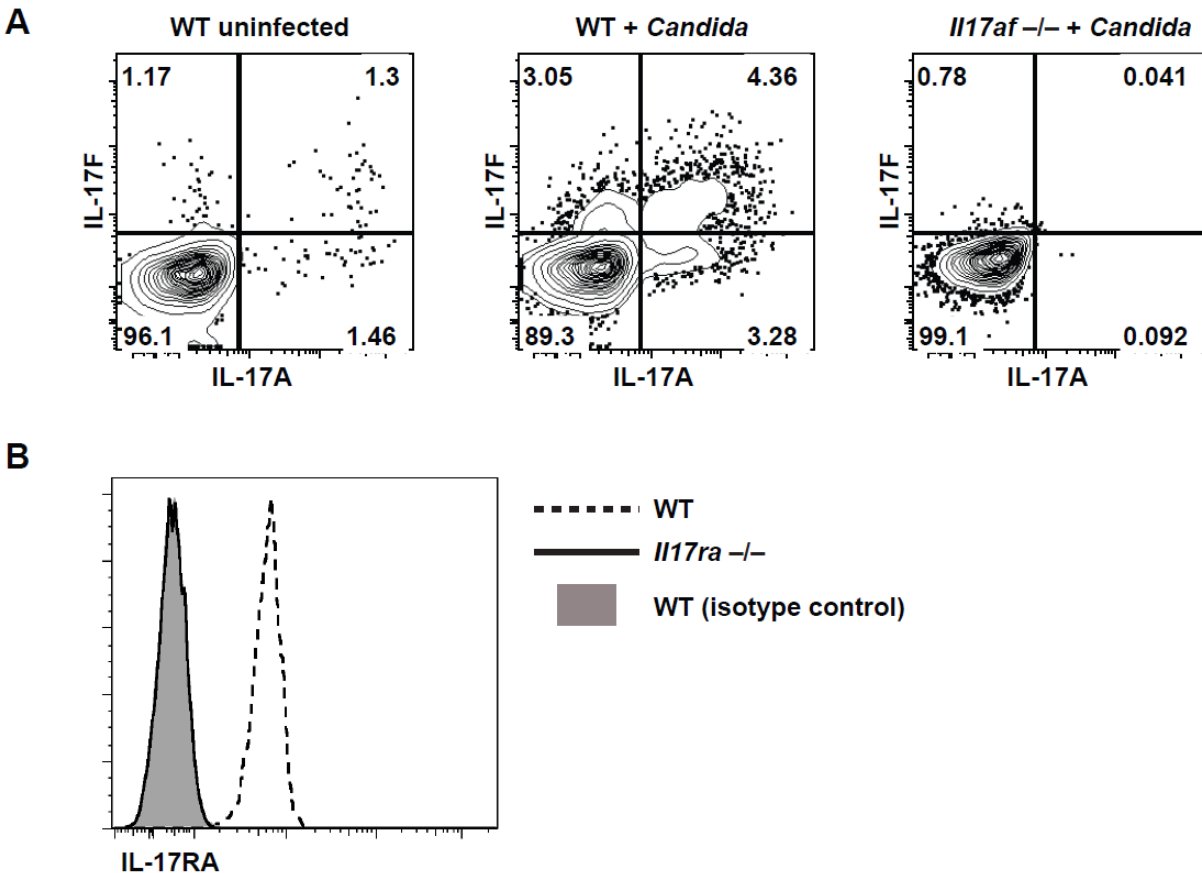

**Supplementary Figure 1: Verification of IL-17AF and IL-17RA knockout mice. A)** Wildtype (WT) or *Il17af*<sup>-/-</sup> C57BL/6 mice were infected with *Candida albicans* on the skin. Seven days later, lymphocytes harvested from lymph nodes and spleen were analyzed for intracellular cytokine expression. The left panel shows an uninfected WT mouse. Upstream gating includes live singlet lymphocytes expressing CD4 and CD44. **B)** Neutrophils from WT and *Il17ra*<sup>-/-</sup> C57BL/6 mice were analyzed for cell surface expression of IL-17RA. Upstream gating includes live singlet cells expressing Gr-1 and F4/80. The dashed line histogram represents WT neutrophils, the solid line histogram represents *Il17ra*<sup>-/-</sup> neutrophils, and the gray filled histogram represents WT neutrophils stained with isotype control antibody.

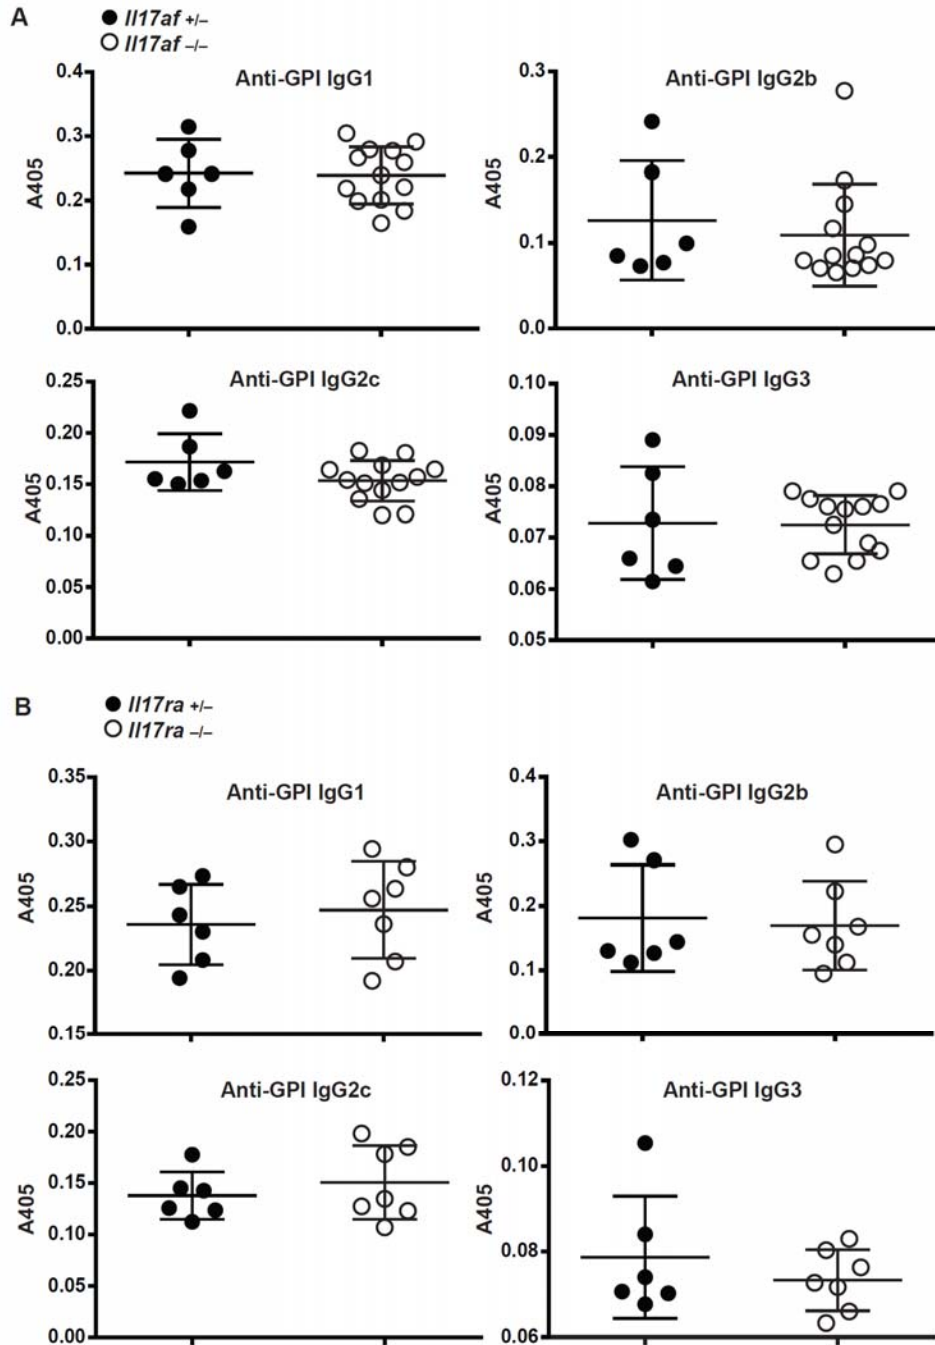

**Supplementary Figure 2: Absence of IL-17A and IL-17F or of IL-17RA in K/B/g7 mice does not affect anti-GPI IgG subtype production.** A) The titers of the indicated subtypes of anti-GPI IgG were determined in serum from *Il17af*<sup>+/-</sup> or *Il17af*<sup>-/-</sup> K/B/g7 mice. B) The titers of the indicated subtypes of anti-GPI IgG were determined in serum from *Il17ra*<sup>+/-</sup> or *Il17ra*<sup>-/-</sup> K/B/g7 mice. Each point represents one 8-week-old mouse; means  $\pm$  SD. There are no statistically significant differences.

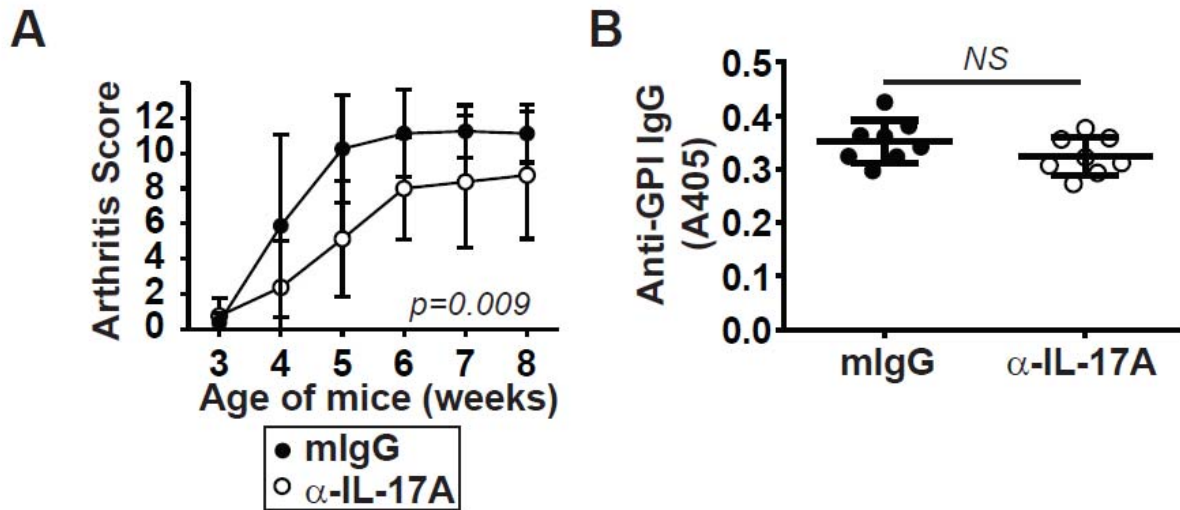

**Supplementary Figure 3: Antibody blockade of IL-17A reduces arthritis severity in K/BxN mice.** K/BxN mice were treated with anti-IL-17A blocking antibody or control mouse IgG beginning at 3-4 weeks of age. **A)** Arthritis was assessed at the indicated ages;  $n=8/\text{group}$ , means  $\pm$  SD. **B)** Serum anti-GPI IgG titers from the same mice, measured at 8 weeks of age at 1:300 dilution. Each point represents one mouse, means  $\pm$  SD; NS – not significant.

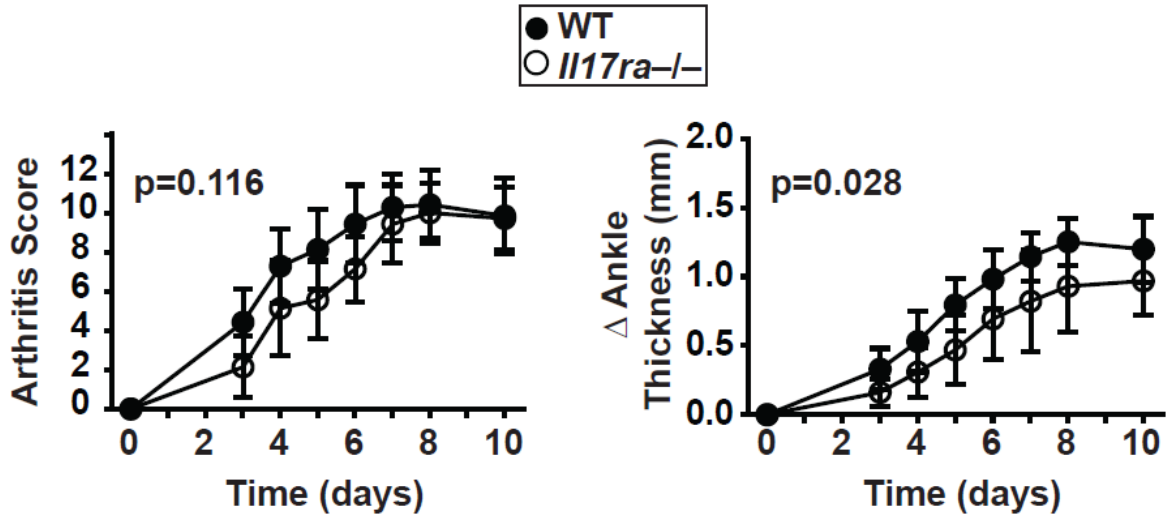

**Supplementary Figure 4: Mice lacking IL-17RA develop slightly less severe K/BxN serum-transferred arthritis.** Serum from K/BxN mice was injected into wildtype (WT) or *Il17ra*<sup>-/-</sup> C57BL/6 mice on days 0 and 2, followed by assessment of arthritis severity measured by arthritis score (left panel) and change in ankle thickness (right panel). Filled circles represent WT mice, and open circles represent *Il17ra*<sup>-/-</sup> mice; n=7/group, means ± SD. Repeated-measures ANOVA was used to calculate p-values.
